# Supplementary material
Source: PubMed Central journal article supplement (PMC8092378)
Supplement: pnas.2022489118.sapp.pdf [file pnas.2022489118.sapp.pdf]

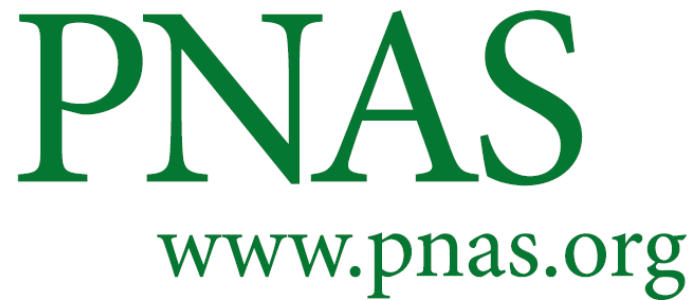

## **Supplementary Information for**

Harnessing psilocybin: antidepressant-like behavioral and synaptic actions of psilocybin are independent of 5-HT<sub>2R</sub> activation in mice

Natalie Hesselgrave<sup>1,2,3</sup> Timothy A. Troppoli<sup>1,4</sup>, Andreas B. Wulff<sup>1,2</sup>, Anthony Cole<sup>1,2,3</sup>, Scott M. Thompson<sup>1,5</sup>

<sup>1</sup>Department of Physiology, <sup>2</sup>Program in Neuroscience, <sup>3</sup>Medical Scientist Training Program, <sup>4</sup>Molecular Medicine Program, <sup>5</sup>Department of Psychiatry, University of Maryland School of Medicine, 655 W. Baltimore St., Baltimore, MD 21201

Corresponding author: [sthompson@som.umaryland.edu](mailto:sthompson@som.umaryland.edu). ORCID #: 0000-0001-9844-9049

### **This PDF file includes:**

Supplemental Figures S1 to S4

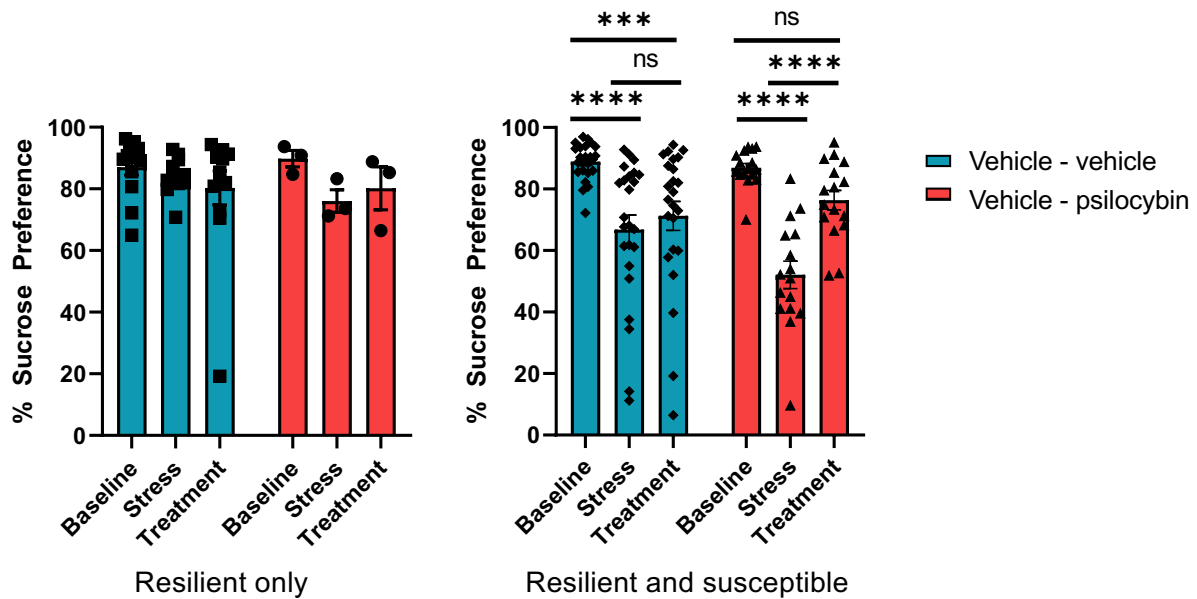

**Supplemental Figure 1. Psilocybin has no effects on reward behavior in resilient animals.**

Resilient mice were defined as those exhibiting a high sucrose preference (>70%) following 14 days CMMS. A. Injection of psilocybin (1mg/kg, ip) had no effect on sucrose preference in resilient animals (n=3, red), nor did injection of vehicle (n=12, blue). Two-way repeated measures ANOVA:  $F_{1,14} = 0.14$ ,  $p = 0.72$ . B. The effects of psilocybin remained significant when data from resilient and susceptible animals are combined. a two-way repeated measures ANOVA ( $F_{2,76} = 4.16$ ,  $p = 0.02$ ). A Holm-Sidak post-hoc test revealed a significant decrease in sucrose preference following CMMS in both vehicle-vehicle and vehicle-psilocybin treated mice that was only rescued by vehicle-psilocybin treatment. Sucrose preference is presented as the group means  $\pm$  SEM with data from individual animals superimposed. \*\*\*\*,  $p < 0.0001$ ; \*\*\*,  $p < 0.001$ ; ns, not significant

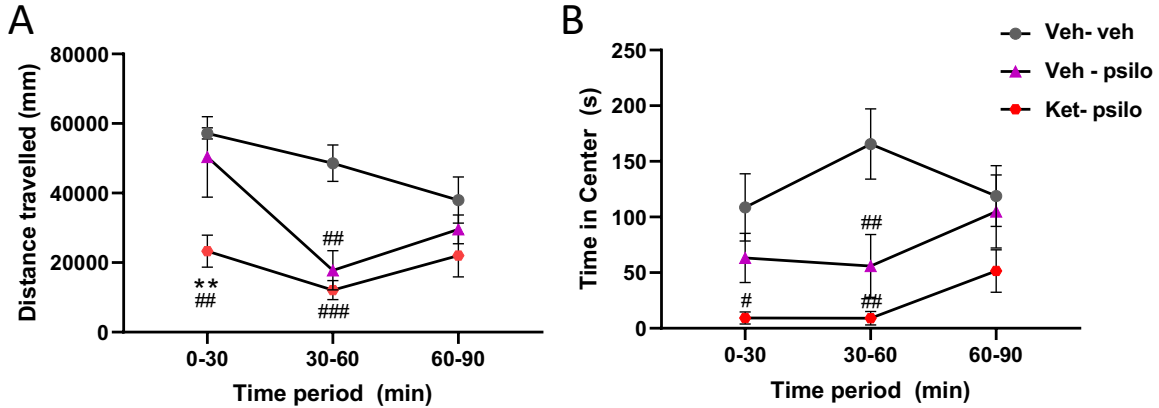

**Supplemental Figure 2. Ketanserin pretreatment enhances the hypolocomotive effects of psilocybin.** A separate cohort of animals were pretreated with saline vehicle (n = 9) or ketanserin (n = 9; 2 mg/kg) 60 minutes prior to psilocybin (5 mg/kg) administration. Following injection with psilocybin at time 0, mice were immediately placed in open field arenas and video recorded for 90 minutes. A) Ketanserin-psilocybin mice travelled less at 0-30 minutes compared to vehicle-vehicle controls (n = 6; p = 0.0019) and vehicle-psilocybin mice (p = 0.0059), and at 30-60 minutes (p = 0.0008) compared to controls. Vehicle-psilocybin mice displayed hypolocomotion compared to controls at 30-60 minutes timepoint (p = 0.005). There was a significant effect of treatment ( $F_{2,21} = 7.56$ , p = 0.0034), time ( $F_{2,42} = 10.69$ , p = 0.0002) and interaction of time x treatment ( $F_{4,42} = 3.17$ , p = 0.023). B) Mice treated with ketanserin-psilocybin spent less time in the center of the arena compared to control mice at 0-30 minutes (p = 0.017) and 30-60 minutes (p = 0.0001), while vehicle-psilocybin mice displayed less center time compared to controls at 30-60 minute timepoint (p = 0.0077). There was a significant effect of treatment on time in center ( $F_{2,21} = 7.085$ , p = 0.0045) but no effect of time ( $F_{2,42} = 2.58$ , p = 0.088). Individual points represent the mean +/- SEM for treatment groups at each timepoint. ## v. control, p<0.01; \*\* v. veh-psil, p<0.01; \*\*\* v. control, p<0.001.

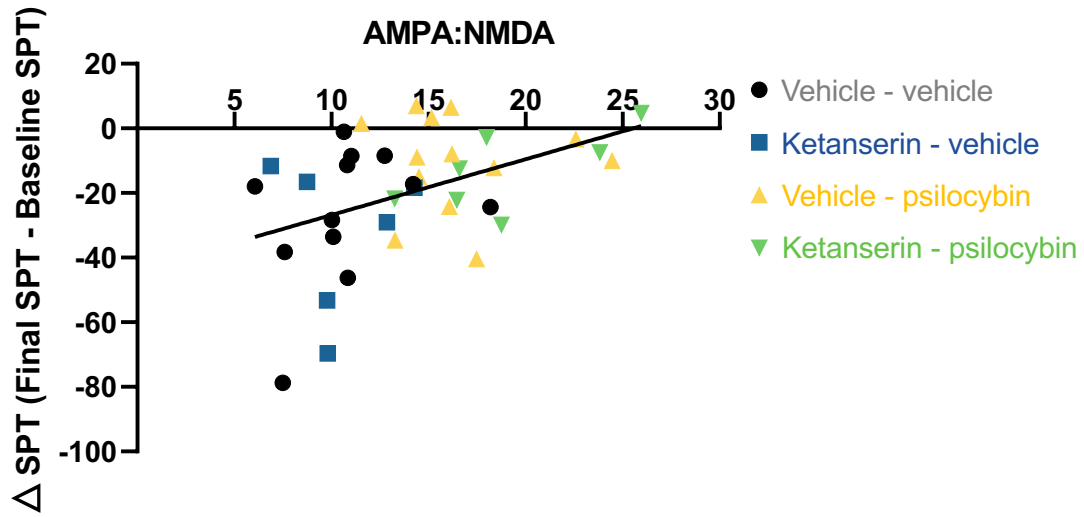

**Supplemental Figure 3. Synaptic strength is correlated with changes in sucrose preference.** Changes in sucrose preference in individual mice between baseline and post-treatment measurements were significantly correlated with the average AMPA:NMDA ratio, a measure of TA-CA1 synaptic strength ( $y = 1.725x - 44.06$ ,  $R^2 = 0.18$ ,  $p = 0.0072$ ).

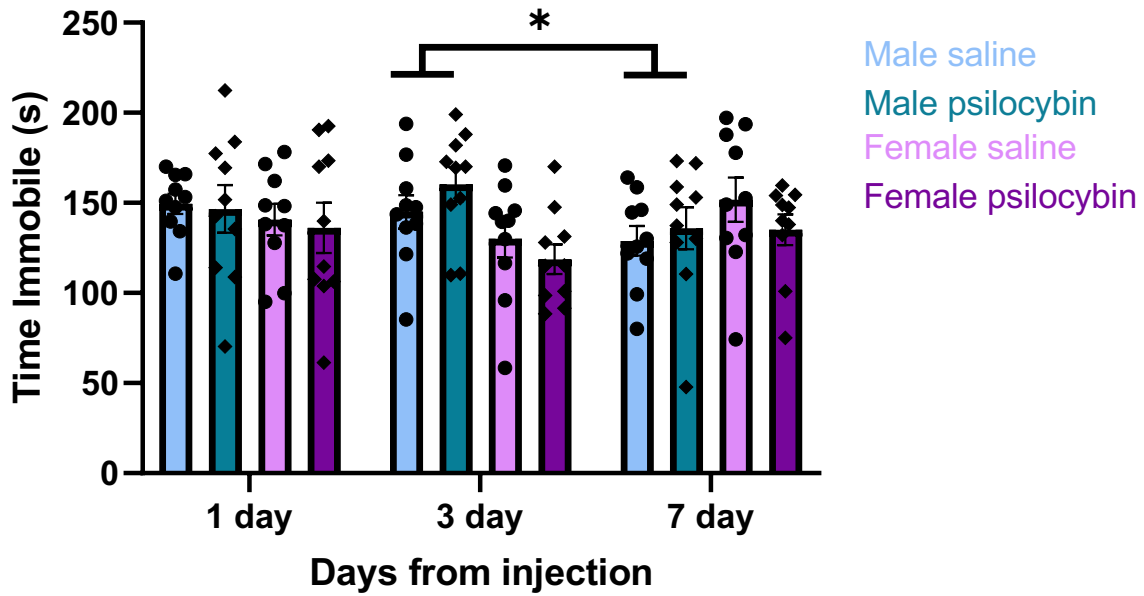

**Supplemental Figure 4. Psilocybin has no effect on immobility time in the forced swim test.** A cohort of unstressed C57Bl/6J were injected with psilocybin (n = 10 males, n = 10 females; 1 mg/kg) or saline (n = 10 males, n = 10 females). Time spent immobile during the forced swim test was measured 1, 3, and 7 days post-injection. There was no effect of psilocybin ( $F_{1, 18} = 2.28$ ,  $p = 0.15$ ) or time ( $F_{2, 36} = 1.53$ ,  $p = 0.23$ ) in the female cohort. In the male cohort, there was a significant effect of time ( $F_{2, 36} = 3.85$ ,  $p = 0.031$ ) but no effect of psilocybin ( $F_{1, 18} = 0.36$ ,  $p = 0.56$ ). Post-hoc comparisons in the male cohort revealed a significant difference in immobility time between days 3 and 7 ( $p = 0.031$ ), but no differences between saline and psilocybin treated animals at any timepoint. The height of the bars represents the mean  $\pm$  SEM. \*,  $p < 0.05$
